# Supplementary material for: Histone H4 acetylation required for chromatin decompaction during DNA replication
Source: PubMed Central journal article supplement (PMC4520004; doi:10.1038/srep12720), 2015-07-30
Supplement: srep12720-s1.pdf [file srep12720-s1.pdf]

## Supplementary Information

# Histone H4 acetylation required for chromatin decompaction during DNA replication

Kun Ruan<sup>1</sup>, Takaharu G. Yamamoto<sup>2</sup>, Haruhiko Asakawa<sup>1</sup>, Yuji Chikashige<sup>2</sup>, Hiroshi Kimura<sup>3</sup>, Hisao Masukata<sup>4</sup>, Tokuko Haraguchi<sup>1,2</sup> and Yasushi Hiraoka<sup>1,2\*</sup>

<sup>1</sup>Graduate School of Frontier Biosciences, Osaka University, 1-3 Yamadaoka, Suita 565-0871, Japan; <sup>2</sup>Advanced ICT Research Institute Kobe, National Institute of Information and Communications Technology, 588-2 Iwaoka, Iwaoka-cho, Nishi-ku, Kobe 651-2492, Japan; <sup>3</sup>Department of Biological Sciences, Graduate School of Bioscience and Biotechnology, Tokyo Institute of Technology, 4259 Nagatsuda, Midori-ku, Yokohama 226-8501, Japan; <sup>4</sup>Department of Biological Sciences, Graduate School of Science, Osaka University, 1-1 Machikaneyama-cho, Toyonaka 560-0043, Japan

Running title: Histone H4 acetylation in *S. pombe*

Keywords: meiosis, DNA replication, chromatin, histone acetylation, fission yeast

\*Corresponding author: Yasushi Hiraoka

Tel.: +81 6 6879 4621

Fax: +81 6 6879 4622

Email: hiraoka@fbs.osaka-u.ac.jp

**Table S1 Stain list**

| Figures         | Strain names | Genotypes                                                                                                                                                                                                                                                                                                                                 | Sources                   |
|-----------------|--------------|-------------------------------------------------------------------------------------------------------------------------------------------------------------------------------------------------------------------------------------------------------------------------------------------------------------------------------------------|---------------------------|
| <b>Figure 1</b> | AY278-11B    | <i>h<sup>+</sup> lys1-131 ura4-D18 his7<sup>+</sup>::lacI-GFP</i>                                                                                                                                                                                                                                                                         | Ding <i>et al.</i> , 2006 |
|                 | AY286-4A     | <i>h<sup>-</sup> ade6-216 leu1-32 ura4-D18 lys1<sup>+</sup>::taz1-GFP taz1Δ::ura4<sup>+</sup> ade8<sup>+</sup>::kan<sup>r</sup>-ura4<sup>+</sup>-lacOp] his7<sup>+</sup>::lacI-GFP</i>                                                                                                                                                    | Ding <i>et al.</i> , 2006 |
|                 | AY278-6A     | <i>h<sup>+</sup> lys1-131 ura4-D18 rec8Δ::ura4<sup>+</sup> his7<sup>+</sup>::lacI-GFP</i>                                                                                                                                                                                                                                                 | Ding <i>et al.</i> , 2006 |
|                 | AY286-10C    | <i>h<sup>-</sup> leu1-32 ura4-D18 rec8Δ::ura4<sup>+</sup> lys1<sup>+</sup>::taz1-GFP taz1Δ::ura4<sup>+</sup> ade8<sup>+</sup> [::kan<sup>r</sup>-ura4<sup>+</sup>-lacOp] his7<sup>+</sup>::lacI-GFP</i>                                                                                                                                   | Ding <i>et al.</i> , 2006 |
|                 | RK539        | <i>h<sup>-</sup> ade6-216 leu1-32 ura4-D18 lys1<sup>+</sup>::taz1-GFP taz1Δ::ura4<sup>+</sup> ade8<sup>+</sup>::kan<sup>r</sup>-ura4<sup>+</sup>-lacOp] his7<sup>+</sup>::lacI-GFP ddb1Δ::hph</i>                                                                                                                                         | This work                 |
|                 | RK540        | <i>h<sup>+</sup> lys1-131 ura4-D18 his7<sup>+</sup>::lacI-GFP ddb1Δ::hph</i>                                                                                                                                                                                                                                                              | This work                 |
|                 | RK901        | <i>h<sup>-</sup> ade6-216 leu1-32 ura4-D18 lys1<sup>+</sup>::taz1-GFP taz1Δ::ura4<sup>+</sup> ade8<sup>+</sup>::kan<sup>r</sup>-ura4<sup>+</sup>-lacOp] his7<sup>+</sup>::lacI-GFP csn1Δ::hph</i>                                                                                                                                         | This work                 |
|                 | RK902        | <i>h<sup>+</sup> lys1-131 ura4-D18 his7<sup>+</sup>::lacI-GFP csn1Δ::hph</i>                                                                                                                                                                                                                                                              | This work                 |
|                 | RK907        | <i>h<sup>-</sup> ade6-216 leu1-32 ura4-D18 lys1<sup>+</sup>::taz1-GFP taz1Δ::ura4<sup>+</sup> ade8<sup>+</sup>::kan<sup>r</sup>-ura4<sup>+</sup>-lacOp] his7<sup>+</sup>::lacI-GFP csn1Δ::hph spd1Δ::nat<sup>r</sup></i>                                                                                                                  | This work                 |
|                 | RK908        | <i>h<sup>+</sup> lys1-131 ura4-D18 his7<sup>+</sup>::lacI-GFP csn1Δ::hph spd1Δ::nat<sup>r</sup></i>                                                                                                                                                                                                                                       | This work                 |
|                 | RK1121       | <i>h<sup>-</sup> ade6-216 his2 leu1-32 lys1-131 ura4-D18 ade1<sup>+</sup>::kan<sup>r</sup>-ura4<sup>+</sup>-lacOp] ade8<sup>+</sup>::kan<sup>r</sup>-ura4<sup>+</sup>-lacOp] his7<sup>+</sup>::lacI-GFP aur1<sup>r</sup>::htb1-mCherry</i>                                                                                                | This work                 |
|                 | RK1130       | <i>h<sup>-</sup> ade6-216 his2 leu1-32 lys1-131 ura4-D18 ade1<sup>+</sup>::kan<sup>r</sup>-ura4<sup>+</sup>-lacOp] ade8<sup>+</sup>::kan<sup>r</sup>-ura4<sup>+</sup>-lacOp] his7<sup>+</sup>::lacI-GFP aur1<sup>r</sup>::htb1-mCherry csn1Δ::nat<sup>r</sup></i>                                                                         | This work                 |
|                 | RK1228       | <i>h<sup>-</sup> leu1-32 ura4-D18 rec8Δ::ura4<sup>+</sup> lys1<sup>+</sup>::taz1-GFP taz1::ura4<sup>+</sup> ade8<sup>+</sup>::kan<sup>r</sup>-ura4<sup>+</sup>-lacOp] his7<sup>+</sup>::lacI-GFP csn1Δ::nat<sup>r</sup></i>                                                                                                               | This work                 |
|                 | RK1229       | <i>h<sup>+</sup> lys1-131 ura4-D18 rec8Δ::ura4<sup>+</sup> his7<sup>+</sup>::lacI-GFP csn1Δ::nat<sup>r</sup></i>                                                                                                                                                                                                                          | This work                 |
|                 | RK1303       | <i>h<sup>90</sup> ade6-210 leu1-32 ura4-D18 cdc10-129 lys1<sup>+</sup>::Padh15-skp1-AfTIR1-2NLS aur1<sup>r</sup>::htb1-mCherry mst1<sup>+</sup>::IAA17-GFP-nat<sup>r</sup> ade1<sup>+</sup>::kan<sup>r</sup>-ura4<sup>+</sup>-lacOp] ade8<sup>+</sup>::kan<sup>r</sup>-ura4<sup>+</sup>-lacOp] his7<sup>+</sup>::lacI-GFP</i>             | This work                 |
|                 | RK1331       | <i>h<sup>90</sup> ade6-210 leu1-32 ura4-D18 cdc10-129 lys1<sup>+</sup>::Padh15-skp1-AfTIR1-2NLS aur1<sup>r</sup>::htb1-mCherry mst1<sup>+</sup>::IAA17-GFP-ura4<sup>+</sup> ade1<sup>+</sup>::kan<sup>r</sup>-ura4<sup>+</sup>-lacOp] ade8<sup>+</sup>::kan<sup>r</sup>-ura4<sup>+</sup>-lacOp] his7<sup>+</sup>::lacI-GFP csn1Δ::hph</i> | This work                 |
| <b>Figure 2</b> | RK1085       | <i>h<sup>-</sup> pat1-114 ura4 lys1<sup>+</sup>::Padh15-skp1-AfTIR1-2NLS</i>                                                                                                                                                                                                                                                              | This work                 |
| <b>Figure 3</b> | RK1481       | <i>h<sup>90</sup> ade6-216 leu1-32 lys1-131 ade1<sup>+</sup>::kan<sup>r</sup>-ura4<sup>+</sup>-lacOp] ade8<sup>+</sup>::kan<sup>r</sup>-ura4<sup>+</sup>-lacOp] his7<sup>+</sup>::lacI-GFP hht1-hhf1Δ::kan<sup>r</sup> csn1Δ::hph hht3-hhf3Δ::nat<sup>r</sup> hht2-hhf2K5R</i>                                                            | This work                 |

|                 |        |                                                                                                                                                                                                                                                                                            |           |
|-----------------|--------|--------------------------------------------------------------------------------------------------------------------------------------------------------------------------------------------------------------------------------------------------------------------------------------------|-----------|
|                 | RK1482 | <i>h<sup>90</sup> ade6-216 leu1-32 lys1-131 ade1[::kan<sup>r</sup>-ura4<sup>+</sup>-lacOp] ade8[::kan<sup>r</sup>-ura4<sup>+</sup>-lacOp] his7<sup>+</sup>::lacI-GFP hht1-hhf1Δ::kan<sup>r</sup> csn1Δ::nat<sup>r</sup> hht3-hhf3Δ::nat<sup>r</sup> hht2-hhf2K12R</i>                      | This work |
|                 | RK1483 | <i>h<sup>90</sup> ade6-216 leu1-32 lys1-131 ura4-D18 ade1[::kan<sup>r</sup>-ura4<sup>+</sup>-lacOp] ade8[::kan<sup>r</sup>-ura4<sup>+</sup>-lacOp] his7<sup>+</sup>::lacI-GFP hht1-hhf1Δ::kan<sup>r</sup> csn1Δ::hph hht3-hhf3Δ::nat<sup>r</sup> hht2-hhf2K8R</i>                          | This work |
|                 | RK1484 | <i>h<sup>90</sup> leu1-32 lys1-131 ade1[::kan<sup>r</sup>-ura4<sup>+</sup>-lacOp] ade8[::kan<sup>r</sup>-ura4<sup>+</sup>-lacOp] his7<sup>+</sup>::lacI-GFP hht1-hhf1Δ::kan<sup>r</sup> csn1Δ::nat<sup>r</sup> hht3-hhf3Δ::nat<sup>r</sup> hht2-hhf2K16R</i>                               | This work |
|                 | RK1532 | <i>h<sup>90</sup> ade6-216 leu1-32 lys1-131 ade1[::kan<sup>r</sup>-ura4<sup>+</sup>-lacOp] ade8[::kan<sup>r</sup>-ura4<sup>+</sup>-lacOp] his7<sup>+</sup>::lacI-GFP hht1-hhf1Δ::kan<sup>r</sup> csn1Δ::nat<sup>r</sup> hht3-hhf3Δ::nat<sup>r</sup></i>                                    | This work |
|                 | RK1590 | <i>h<sup>90</sup> ade6-216 leu1-32 lys1-131 ade1[::kan<sup>r</sup>-ura4<sup>+</sup>-lacOp] ade8[::kan<sup>r</sup>-ura4<sup>+</sup>-lacOp] his7<sup>+</sup>::lacI-GFP hht1-hhf1Δ::kan<sup>r</sup> hht3-hhf3Δ::hph aur1<sup>r</sup>:Pnda3-mCherry-pcn1<sup>+</sup></i>                       | This work |
|                 | RK1591 | <i>h<sup>90</sup> leu1-32 lys1-131 ura4-D18 ade1[::kan<sup>r</sup>-ura4<sup>+</sup>-lacOp] ade8[::kan<sup>r</sup>-ura4<sup>+</sup>-lacOp] his7<sup>+</sup>::lacI-GFP hht2-hhf2K8R/K12R hht1-hhf1Δ::ble<sup>r</sup> hht3-hhf3Δ::hph aur1<sup>r</sup>:Pnda3-mCherry-pcn1<sup>+</sup></i>     | This work |
|                 | RK1597 | <i>h<sup>90</sup> ade6-216 leu1-32 lys1-131 ade1[::kan<sup>r</sup>-ura4<sup>+</sup>-lacOp] ade8[::kan<sup>r</sup>-ura4<sup>+</sup>-lacOp] his7<sup>+</sup>::lacI-GFP hht1-hhf1Δ::ble<sup>r</sup> hht3-hhf3Δ::hph hht2-hhf2K5R aur1<sup>r</sup>:Pnda3-mCherry-pcn1<sup>+</sup></i>          | This work |
|                 | RK1598 | <i>h<sup>90</sup> leu1-32 lys1-131 ade1[::kan<sup>r</sup>-ura4<sup>+</sup>-lacOp] ade8[::kan<sup>r</sup>-ura4<sup>+</sup>-lacOp] his7<sup>+</sup>::lacI-GFP hht1-hhf1Δ::kan<sup>r</sup> hht3-hhf3Δ::hph hht2-hhf2K12R aur1<sup>r</sup>:Pnda3-mCherry-pcn1<sup>+</sup></i>                  | This work |
|                 | RK1599 | <i>h<sup>90</sup> ade6-216 leu1-32 lys1-131 ura4-D18 ade1[::kan<sup>r</sup>-ura4<sup>+</sup>-lacOp] ade8[::kan<sup>r</sup>-ura4<sup>+</sup>-lacOp] his7<sup>+</sup>::lacI-GFP hht1-hhf1Δ::ble<sup>r</sup> hht3-hhf3Δ::hph hht2-hhf2K8R aur1<sup>r</sup>:Pnda3-mCherry-pcn1<sup>+</sup></i> | This work |
|                 | RK1600 | <i>h<sup>90</sup> ade6-216 leu1-32 lys1-131 ade1[::kan<sup>r</sup>-ura4<sup>+</sup>-lacOp] ade8[::kan<sup>r</sup>-ura4<sup>+</sup>-lacOp] his7<sup>+</sup>::lacI-GFP hht1-hhf1Δ::kan<sup>r</sup> hht3-hhf3Δ::hph hht2-hhf2K16R aur1<sup>r</sup>:Pnda3-mCherry-pcn1<sup>+</sup></i>         | This work |
| <b>Figure 4</b> | RK1201 | <i>h<sup>90</sup> ura4-D18 leu1-32 lys1-131 hht1-hhf1Δ::kan<sup>r</sup> hht3-hhf3Δ::nat<sup>r</sup> aur1<sup>r</sup>:htb1-mCherry</i>                                                                                                                                                      | This work |
|                 | RK1202 | <i>h<sup>90</sup> ura4-D18 leu1-32 lys1-131 hht1-hhf1Δ::kan<sup>r</sup> hht2-hhf2K5R hht3-hhf3Δ::nat<sup>r</sup> aur1<sup>r</sup>:htb1-mCherry</i>                                                                                                                                         | This work |
|                 | RK1206 | <i>h<sup>90</sup> ura4-D18 leu1-32 lys1-131 hht1-hhf1Δ::kan<sup>r</sup> hht2-hhf2K8R hht3-hhf3Δ::nat<sup>r</sup> aur1<sup>r</sup>:htb1-mCherry</i>                                                                                                                                         | This work |
|                 | RK1281 | <i>h<sup>90</sup> ura4-D18 leu1-32 lys1<sup>+</sup>::Ppcn1-GFP-pcn1<sup>+</sup> hht1-hhf1Δ::kan<sup>r</sup> hht3-hhf3Δ::nat<sup>r</sup> aur1<sup>r</sup>:htb1-mCherry</i>                                                                                                                  | This work |
|                 | RK1320 | <i>h<sup>90</sup> ura4-D18 leu1-32 lys1-131 hht1-hhf1Δ::kan<sup>r</sup> hht2-hhf2K8/K12R hht3-hhf3Δ::nat<sup>r</sup></i>                                                                                                                                                                   | This work |
|                 | RK1333 | <i>h<sup>90</sup> ura4-D18 leu1-32 lys1-131 hht1-hhf1Δ::kan<sup>r</sup> hht2-hhf2K12R hht3-hhf3Δ::nat<sup>r</sup> aur1<sup>r</sup>:htb1-mCherry</i>                                                                                                                                        | This work |
|                 | RK1334 | <i>h<sup>90</sup> ura4-D18 leu1-32 lys1-131 hht1-hhf1Δ::kan<sup>r</sup></i>                                                                                                                                                                                                                | This work |

|                  |        |                                                                                                                                                                                             |           |
|------------------|--------|---------------------------------------------------------------------------------------------------------------------------------------------------------------------------------------------|-----------|
|                  |        | <i>hht2-hhf2K16R hht3-hhf3Δ::nat<sup>r</sup> aur1<sup>r</sup>::htb1-mCherry</i>                                                                                                             |           |
|                  | RK1335 | <i>h<sup>90</sup> ura4-D18 leu1-32 lys1-131 hht1-hhf1Δ::kan<sup>r</sup> hht2-hhf2K8/K12R hht3-hhf3Δ::nat<sup>r</sup> aur1<sup>r</sup>::htb1-mCherry</i>                                     | This work |
|                  | RK1352 | <i>h<sup>90</sup> ura4-D18 leu1-32 lys1<sup>+</sup>::Ppcn1-GFP-pcn1<sup>+</sup> hht1-hhf1Δ::kan<sup>r</sup> hht2-hhf2K8/K12R hht3-hhf3Δ::nat<sup>r</sup> aur1<sup>r</sup>::htb1-mCherry</i> | This work |
| <b>Figure S1</b> | RK1577 | <i>h<sup>90</sup> ura4-D18 leu1-32 lys1<sup>+</sup>::htb1-GFP hht1-hhf1Δ::kan<sup>r</sup> Dhht3-hhf3Δ::nat<sup>r</sup></i>                                                                  | This work |
|                  | RK1243 | <i>h<sup>90</sup> ura4-D18 leu1-32 lys1<sup>+</sup>::htb1-GFP hht1-hhf1Δ::kan<sup>r</sup> hht3-hhf3Δ::nat<sup>r</sup> csn1Δ::hph</i>                                                        | This work |
|                  | RK1245 | <i>h<sup>90</sup> ura4-D18 leu1-32 lys1<sup>+</sup>::htb1-GFP hht1-hhf1Δ::kan<sup>r</sup> hht2-hhf2K8R hht3-hhf3Δ::nat<sup>r</sup> csn1Δ::hph</i>                                           | This work |
|                  | RK1258 | <i>h<sup>90</sup> ade6-216 ura4-D18 leu1-32 lys1<sup>+</sup>::htb1-GFP mes1::LEU2 hht1-hhf1Δ::kan<sup>r</sup> hht2-hhf2K5R csn1Δ::hph hht3-hhf3Δ::nat<sup>r</sup></i>                       | This work |
|                  | RK1260 | <i>h<sup>90</sup> ura4-D18 leu1-32 lys1<sup>+</sup>::htb1-GFP hht1-hhf1Δ::kan<sup>r</sup> hht2-hhf2K12R csn1Δ::hph hht3-hhf3Δ::nat<sup>r</sup></i>                                          | This work |
|                  | RK1261 | <i>h<sup>90</sup> ura4-D18 leu1-32 lys1<sup>+</sup>::htb1-GFP hht1-hhf1Δ::kan<sup>r</sup> hht2-hhf2K16R csn1Δ::hph hht3-hhf3Δ::nat<sup>r</sup></i>                                          | This work |
| <b>Figure S2</b> | RK478  | <i>h<sup>90</sup> ade6-210 leu1-32 lys1-131 ura4-D18 hht1-mRFP-hph</i>                                                                                                                      | This work |
|                  | RK747  | <i>h<sup>90</sup> ade6-210 leu1-32 lys1-131 ura4-D18 hht1-mRFP-hph rtt109Δ::kan<sup>r</sup> csn1Δ::ura4<sup>+</sup></i>                                                                     | This work |
|                  | RK750  | <i>h<sup>90</sup> ade6-210 leu1-32 lys1-131 ura4-D18 hht1-mRFP-hph mst2Δ::kan<sup>r</sup> csn1Δ::nat<sup>r</sup></i>                                                                        | This work |
|                  | RK753  | <i>h<sup>90</sup> ade6-210 leu1-32 lys1-131 ura4-D18 hht1-mRFP-hph elp3Δ::kan<sup>r</sup> csn1Δ::nat<sup>r</sup></i>                                                                        | This work |
|                  | RK933  | <i>h<sup>90</sup> hht1-mRFP-kan<sup>r</sup> pht1Δ::nat<sup>r</sup> csn1Δ::hph</i>                                                                                                           | This work |
|                  | RK1309 | <i>h<sup>90</sup> ade6-210 leu1-32 ura4-D18 lys1<sup>+</sup>::htb1-mCherry hat1Δ::hph csn1Δ::nat<sup>r</sup></i>                                                                            | This work |
|                  | RK1310 | <i>h<sup>90</sup> ade6-210 leu1-32 ura4-D18 lys1<sup>+</sup>::htb1-mCherry gcn5Δ::hph csn1Δ::nat<sup>r</sup></i>                                                                            | This work |

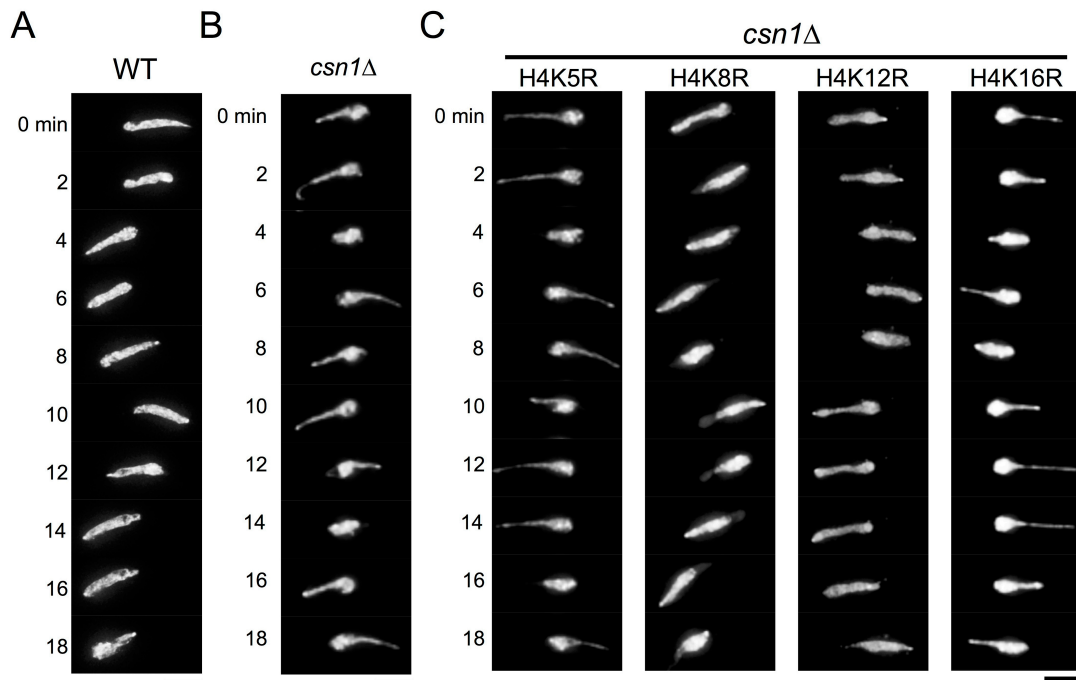

**Figure S1. Morphology of the horsetail nucleus in *csn1Δ* cells expressing mutant histone H4**

Time-lapse imaging of the horsetail nucleus. Chromatin was marked with Htb1 (histone H2B)-GFP. Numbers on the left indicate time in minutes. Scale bars indicate 5  $\mu\text{m}$ . (A) Wild type, (B) *csn1Δ* expressing wild-type histone H4, and (C) *csn1Δ* expressing histone H4 mutants as indicated.

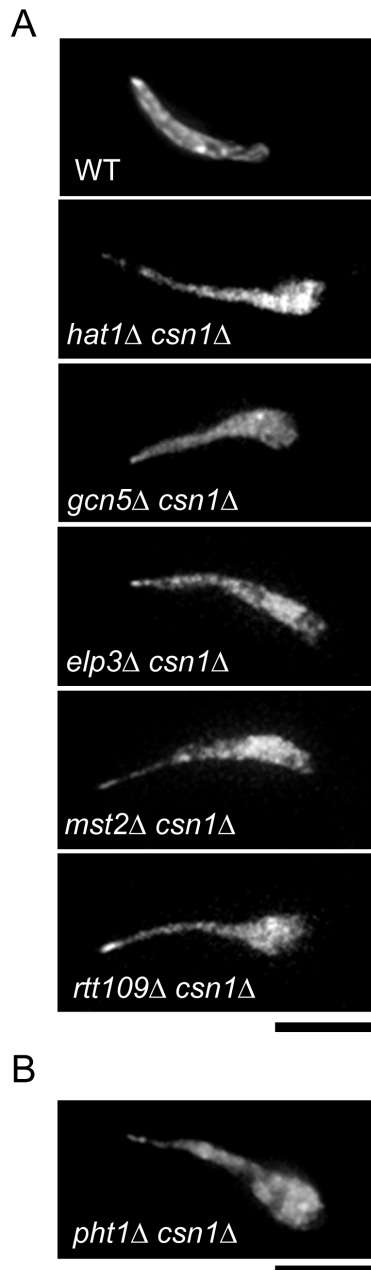

**Figure S2. The stretched horsetail nucleus in HAT and H2A.Z mutants**

(A) Morphology of the horsetail nucleus in the *csn1* $\Delta$  HAT double mutants. (B) Morphology of the horsetail nucleus in the *csn1* $\Delta$  *pht1* $\Delta$  double mutant. Chromatin was marked with Hht1 (histone H3)-mRFP. Scale bar indicates 5  $\mu$ m.
